# Supplementary material for: Enhanced photothermal behavior derived from controllable self-assembly of Cu1.94S microstructures
Source: Royal Society of Chemistry journal article supplement (doi:10.1039/c8dt04856h), 2019-01-01
Supplement: c8dt04856h1.pdf [file c8dt04856h1.pdf]

## SUPPORTING INFORMATION

### Enhanced photothermal behavior derived from controllable self-assembly of $\text{Cu}_{1.94}\text{S}$ microstructures

*Xiao Shao<sup>a</sup>, Tianyong Zhang<sup>a,b,c,\*</sup>, Bin Li<sup>a,c,\*</sup>, Minghao Zhou<sup>a</sup>, Xiaoyuan Ma<sup>a</sup>, Jingchao Wang<sup>a</sup>, Shuang Jiang<sup>a,\*</sup>*

- a. Tianjin Key Laboratory of Applied Catalysis Science and Technology, School of Chemical Engineering and Technology, Tianjin University, Tianjin 300354, China
- b. Collaborative Innovation Center of Chemical Science and Engineering(Tianjin), Tianjin 300072, China
- c. Tianjin Engineering Research Center of Functional Fine Chemicals, Tianjin 300354, China

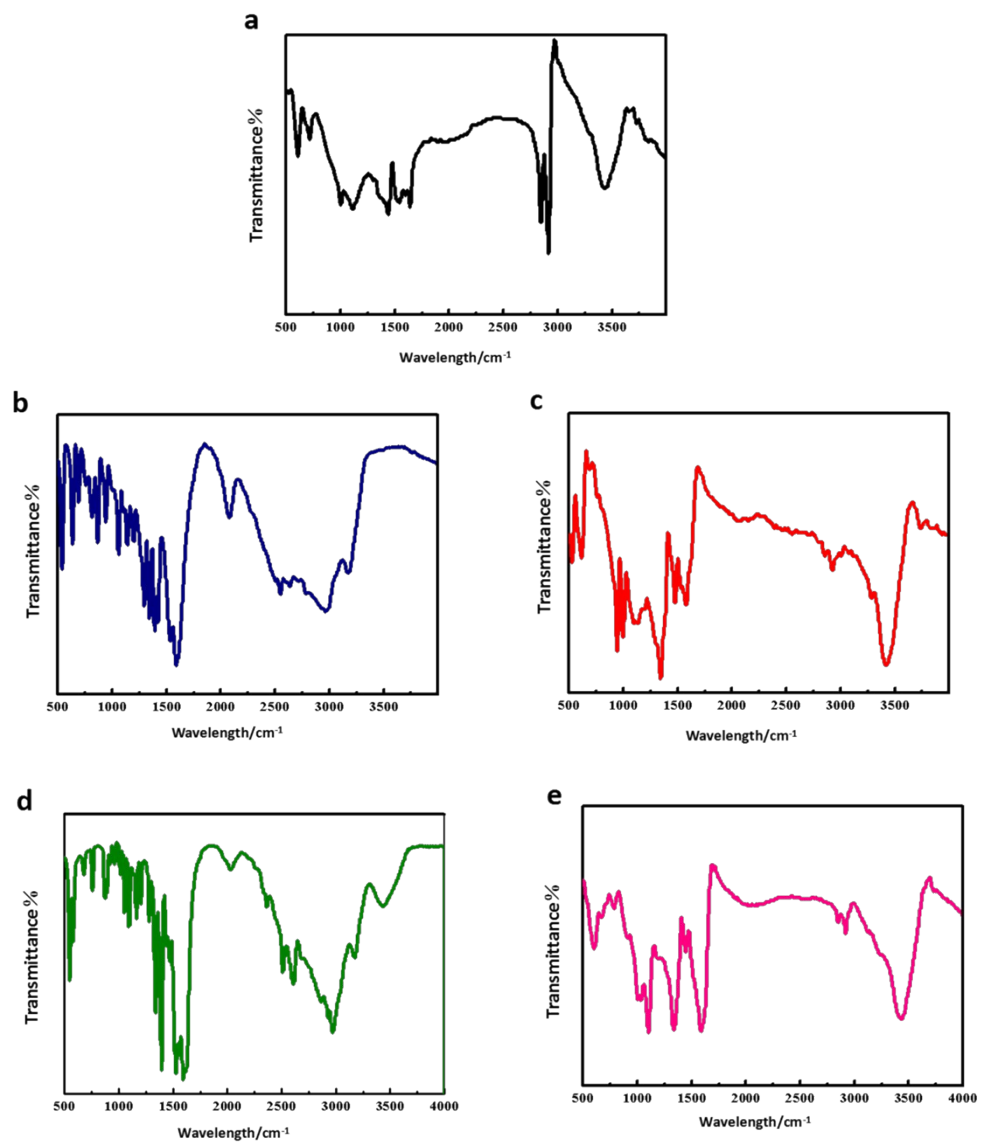

**Fig. S1** FTIR spectra of (a) Cu<sub>1.94</sub>S QDs stabilized with OA/OM, (b) free cysteine ligands, (c) Cu<sub>1.94</sub>S NCs stabilized with cysteine, (d) free penicillamine ligands, (e) Cu<sub>1.94</sub>S NCs stabilized with penicillamine.

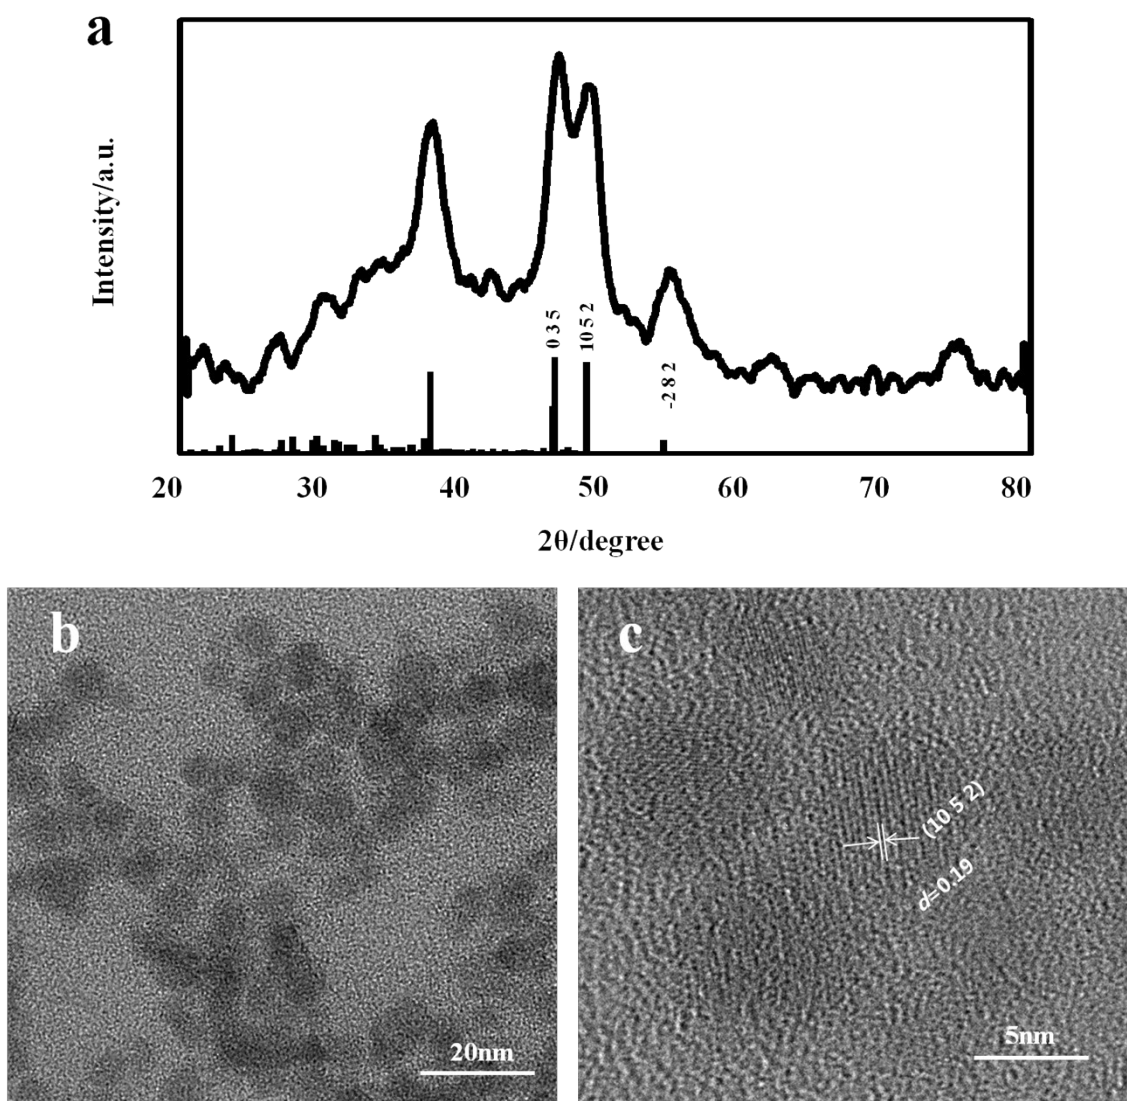

**Fig. S2** (a) XRD patterns, (b) TEM image and (c) TEM image of cysteine-capped water-soluble  $\text{Cu}_{1.94}\text{S}$  NCs.

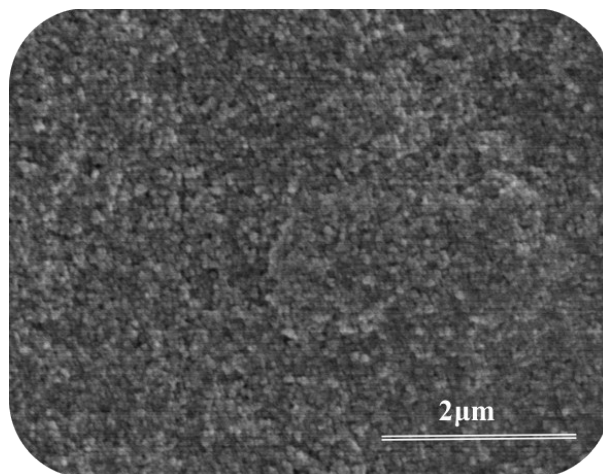

**Fig. S3** SEM images of penicilliamine-capped water-soluble Cu<sub>1.94</sub>S self-assembly products for 3 days.

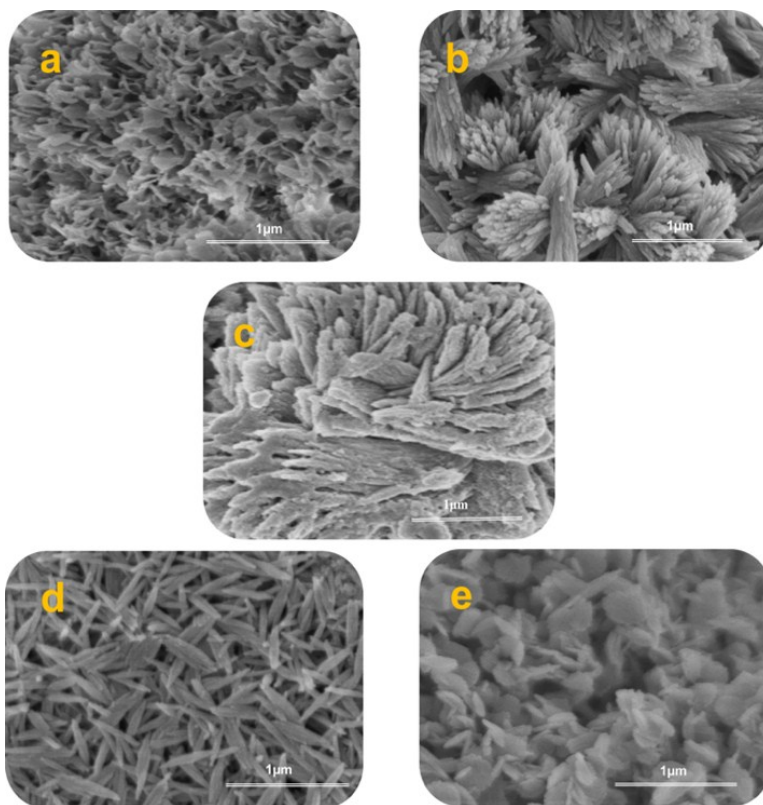

**Fig. S4** (a~e) SEM images of assembly units of final 3D structures with water-soluble Cu<sub>1.94</sub>S NCs in W, W/E, W/M, W/M-3, W/M-4 for one day respectively.

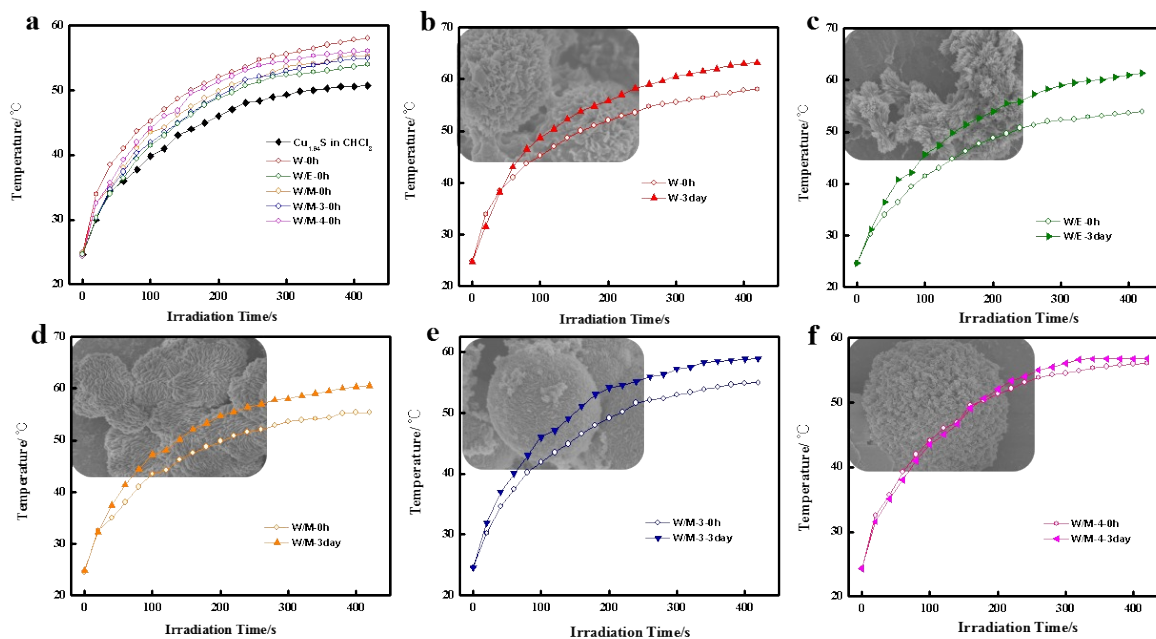

**Fig. S5** (a) The temperature elevation of  $\text{Cu}_{1.94}\text{S}$  QDs in  $\text{CHCl}_3$  and cysteine capped  $\text{Cu}_{1.94}\text{S}$  in 0h; (b-f) The temperature elevation of the  $\text{Cu}_{1.94}\text{S}$  self-assemblies and corresponding starting isolated  $\text{Cu}_{1.94}\text{S}$  NCs.
